# Supplementary material for: Skin-Whitening Effect of a Callus Extract of Nelumbo nucifera Isolate Haman
Source: MDPI journal article supplement (doi:10.3390/plants12233923), 2023-11-21
Supplement: s1 [file s1]

## Supplementary material

**Table S1.** Media used for callus induction of lotus from Haman region. All media were sterilized at 121°C, 15 min and pH was adjusted to 5.8.

|                                                      | mg/L     |          |          |          |          |          |          |
|------------------------------------------------------|----------|----------|----------|----------|----------|----------|----------|
|                                                      | M1       | M2       | M3       | M5       | M6       | M7       | M8       |
| NH <sub>4</sub> NO <sub>3</sub>                      | -        | 1,650.0  |          | 825.0    |          | 1,650.0  |          |
| KNO <sub>3</sub>                                     | 2,500.0  | 1,900.0  | 2,500.0  | 950.0    | 2,500.0  | 1,900.0  | 2,830.0  |
| MgSO <sub>4</sub> · 7H <sub>2</sub> O                | 400.0    | 370.0    | 250.0    | 185.0    | 250.0    | 370.0    | 184.85   |
| (NH <sub>4</sub> ) <sub>2</sub> SO <sub>4</sub>      |          |          | 134.0    |          | 134.0    |          | 462.49   |
| MnSO <sub>4</sub> · H <sub>2</sub> O                 | 10.0     | 22.3     | 10.0     | 11.2     | 10.0     | 22.3     | 2.98     |
| ZnSO <sub>4</sub> · 7H <sub>2</sub> O                | 1.0      | 8.6      | 2.0      | 4.3      | 2.0      | 8.6      | 1.5      |
| CuSO <sub>4</sub> · 5H <sub>2</sub> O                | 0.2      | 0.025    | 0.025    | 0.013    | 0.025    | 0.025    |          |
| KI                                                   | 1.0      | 0.83     | 0.75     | 0.42     | 0.75     | 0.83     | 0.8      |
| NaH <sub>2</sub> PO <sub>4</sub>                     |          |          | 150.0    |          | 150.0    |          |          |
| KCl                                                  |          |          | 300.0    |          | 300.0    |          |          |
| CoCl <sub>2</sub> · 6H <sub>2</sub> O                | 0.1      | 0.025    | 0.025    | 0.013    | 0.025    | 0.025    |          |
| NH <sub>2</sub> H <sub>2</sub> PO <sub>4</sub>       | 300.0    |          | 150.0    |          | 150.0    |          |          |
| CaCl <sub>2</sub> · 2H <sub>2</sub> O                | 200.0    |          | 150.0    | 220.0    | 150.0    | 440.0    | 125.42   |
| KH <sub>2</sub> PO <sub>4</sub>                      |          |          |          | 85.0     |          | 170.0    | 313.0    |
| H <sub>3</sub> BO <sub>3</sub>                       | 5.0      | 6.2      | 3.0      | 3.1      | 3.0      | 6.2      | 1.6      |
| Na <sub>2</sub> MoO <sub>4</sub> · 2H <sub>2</sub> O | 0.1      | 0.25     | 0.25     | 0.13     | 0.25     | 0.25     | 0.25     |
| FeSO <sub>4</sub> · 7H <sub>2</sub> O                | 15.0     | 27.85    | 27.85    | 13.93    | 27.85    | 27.85    | 27.85    |
| Na <sub>2</sub> -EDTA                                | 20.0     | 37.25    | 37.25    | 18.63    | 28.0     | 37.25    | 37.25    |
| Myo-inositol                                         | 1,000.0  | 100.0    | 100.0    | 6,000.0  | 100.0    | 100.0    | 100.0    |
| Thiamine HCl                                         | 5.0      | 0.4      | 10.0     | 0.4      | 10.0     | 0.4      | 1.1      |
| Nicotinic acid                                       | 5.0      |          | 1.0      |          | 1.0      |          | 0.5      |
| Pyridoxine HCl                                       | 0.5      |          | 1.0      |          | 1.0      |          | 0.5      |
| Sucrose                                              | 30,000.0 | 30,000.0 | 20,000.0 | 30,000.0 | 20,000.0 | 30,000.0 | 30,000.0 |
| Phytigel                                             | 4,000.0  | 4,000.0  | 4,000.0  | 4,000.0  | 4,000.0  | 4,000.0  | 4,000.0  |
| Proline                                              |          |          |          |          |          |          | 700.0    |
| Glycine                                              |          |          |          |          |          |          | 2.0      |
| Casain hydrolysate                                   |          |          |          |          |          |          | 100.0    |
| 2,4-Dichlorophenoxyacetic acid                       | 0.5      |          |          |          | 1.5      | 1.0      |          |
| p-chlorophenoxyacetic acid                           | 2.0      |          |          |          |          |          |          |
| Kinetin                                              | 0.1      |          | 0.1      |          | 0.1      |          |          |
| 6-benzyladenin                                       |          | 1.0      |          | 1.0      |          |          |          |
| α-naphthaleneacetic acid                             |          | 2.0      | 1.0      |          | 1.0      |          |          |
| Indole-3-acetic acid                                 |          |          |          |          | 0.1      |          |          |

**Table S2.** Process and raw material list for cream manufacturing.

| Phase         | Component                    | Content (%) |
|---------------|------------------------------|-------------|
| Aqueous phase | Purified water               | Up to 100   |
|               | Glycerin                     | 10-25       |
|               | Betaine                      | -           |
|               | Sodium hyaluronate           | -           |
|               | Thickener                    | q.s         |
|               | Chelating agent              | q.s         |
| Oil phase     | PEG-100 stearate             | 0.1-2       |
|               | Glyceryl stearate            | 0.1-2       |
|               | Polysorbate 60               | 0.1-2       |
|               | Stearic acid                 | 0.1-2       |
|               | Cetearyl alcohol             | 0.1-2       |
|               | Capric/caprylic triglyceride | 10-30       |
|               | Tocopheryl acetate           | 0.1-0.5     |
| Addition I    | Fragrance                    | q.s         |
|               | Preservative                 | q.s         |
|               | Other additives              | q.s         |

q.s: Quantum satis
